# Supplementary material for: An Internet Quiz Game Intervention for Adolescent Alcohol Drinking: A Clustered RCT
Source: Oxford University Press journal article supplement (doi:10.1542/peds.2021-051005), 2021-11-29
Supplement: peds_2021051005supplementarydata.pdf [file peds_2021051005supplementarydata.pdf]

## Supplemental Information

**SUPPLEMENTAL TABLE 5** Complete-Case Analysis of Intervention Effectiveness

|                                                  | Intervention Effect (95% CI) | <i>P</i> |
|--------------------------------------------------|------------------------------|----------|
| At 1-month follow-up                             |                              |          |
| Any drinking in past the 30 days, RR             | 0.76 (0.64 to 0.90)          | .001**   |
| Units drank per day in the past 30 days, $\beta$ | −0.07 (−0.11 to −0.02)       | .009**   |
| Number of alcohol-related troubles, RR           | 0.58 (0.23 to 1.49)          | .26      |
| Number of times drunk in the past 30 days, RR    | 0.54 (0.23 to 1.23)          | .14      |
| Alcohol-related knowledge, $\beta$               | 0.20 (0.00 to 0.41)          | .06      |
| Perceived social norm, $\beta$                   |                              |          |
| Parents                                          | 0.11 (0.03 to 0.19)          | .01*     |
| Peers                                            | 0.10 (0.01 to 0.19)          | .04*     |
| Perceived behavioral control, $\beta$            | 0.15 (0.05 to 0.24)          | .006**   |
| At 3-month follow-up                             |                              |          |
| Any drinking in past the 30 days, RR             | 0.84 (0.71 to 0.99)          | .04*     |
| Units drank per day in the past 30 days, $\beta$ | −0.06 (−0.11 to −0.01)       | .02*     |
| Number of alcohol-related troubles, RR           | 0.26 (0.08 to 0.82)          | .02*     |
| Number of times drunk in the past 30 days, RR    | 0.62 (0.30 to 1.28)          | .20      |
| Alcohol-related knowledge, $\beta$               | 0.24 (0.04 to 0.44)          | .02*     |
| Perceived social norm, $\beta$                   |                              |          |
| Parents                                          | 0.07 (−0.03 to 0.16)         | .18      |
| Peers                                            | 0.08 (−0.02 to 0.17)         | .14      |
| Perceived behavioral control, $\beta$            | 0.08 (−0.01 to 0.18)         | .10      |

Complete-case analysis consists of only participants who provided complete data. All results were adjusted for students' sex, age, family SES index, annual school fee, and corresponding baseline attributes as covariates and intraschool correlation as random intercept. RR for binary outcomes were estimated by using Poisson mixed models with robust SEs; RRs for count outcomes were estimated by using negative binomial mixed models; and  $\beta$  was estimated by using linear mixed models.

\*\* *P* < .01.

\* *P* < .05.
